# Supplementary material
Source: PubMed Central journal article supplement (PMC8429143)
Supplement: NIHMS1732114-supplement-2.pdf [file NIHMS1732114-supplement-2.pdf]

**Table S1: Gene sequences used in this study. Related to Figure 1.**

|                              | Species (Common)            | Species (Scientific)                   | GC-C Accession               | NPR1           | NPR2           | Uroguanylin    | Guanylin       |
|------------------------------|-----------------------------|----------------------------------------|------------------------------|----------------|----------------|----------------|----------------|
| Primates                     | Human                       | <i>Homo sapiens</i>                    | NM_004963.4                  | NM_000906.4    | NM_003995.4    | NP_009033.1    | NP_291031.2    |
|                              | Rhesus Macaque              | <i>Macaca mulatta</i>                  | XM_001089601.4               | XM_002808236.3 | NM_001205340.1 | XP_001087987.1 | XP_001085421.1 |
|                              | Pigtailed Macaque           | <i>Macaca nemestrina</i>               | XM_011741690.2               | XM_011769501.2 | XM_011748195.2 | XP_011762016.1 | XP_011762017.1 |
|                              | Chimpanzee                  | <i>Pan troglodytes</i>                 | XM_528746.6                  | XM_016927544.2 | XM_001168194.5 | XP_524686.2    | XP_001172840.1 |
|                              | Orangutan                   | <i>Pongo abelii</i>                    | XM_002822972.2               | XM_024245905.1 | XM_024252690.1 | XP_002811014.1 | XP_002811013.1 |
|                              | Baboon                      | <i>Papio anubis</i>                    | XM_021922068.1               | XM_003892689.4 | XM_003911520.4 | XP_003891732.1 | XP_003891733.1 |
|                              | Night Monkey                | <i>Aotus nancymaae</i>                 | XM_012447637.1               | XM_012476152.2 | XM_012463327.2 | XP_012289925.1 | XP_012289889.1 |
|                              | Gorilla                     | <i>Gorilla gorilla gorilla</i>         | XM_019037844.1               | XM_019022930.1 | XM_004048004.3 | XP_004025613.1 | XP_004025614.1 |
|                              | Marmoset                    | <i>Callithrix jacchus</i>              | XM_017976534.1               | XM_017966300.1 | XM_002806498.3 | NA             | XP_002750736.1 |
|                              | Crab Eating Macaque         | <i>Macaca fascicularis</i>             | XM_005570213.2               | XM_005541752.2 | XM_005581348.2 | XP_005543815.1 | XP_005543814.1 |
|                              | Gibbon                      | <i>Nomascus leucogenys</i>             | XM_003265528.2               | NA             | XM_011939383.1 | XP_003273395.1 | XP_012366311.1 |
|                              | Sooty Mangabey              | <i>Cercocebus atys</i>                 | XM_012058487.1               | XM_012076614.1 | XM_012087083.1 | XP_011934624.1 | XP_011934623.1 |
|                              | Drill                       | <i>Mandrillus leucophaeus</i>          | XM_011990839.1               | NA             | XM_011980142.1 | XP_011857110.1 | XP_011857111.1 |
|                              | Black and White Colobus     | <i>Colobus angolensis palliatus</i>    | XM_011954200.1               | NA             | XM_011939383.1 | XP_011800278.1 | XP_011800291.1 |
|                              | Squirrel Monkey             | <i>Saimiri boliviensis boliviensis</i> | XM_003934548.2               | XM_003941876.2 | XM_003943789.2 | XP_003937037.1 | XP_003937036.1 |
|                              | Gold Snub Nosed Monkey      | <i>Rhinopithecus roxellana</i>         | XM_010368479.1               | XM_010364757.1 | XM_010376182.2 | XP_010370113.1 | XP_010370115.1 |
|                              | African Green Monkey        | <i>Chlorocebus sabaeus</i>             | XM_007967738.1               | XM_007967738.1 | XM_007968782.1 | XP_007977383.1 | XP_007977382.1 |
|                              | Mouse Lemur                 | <i>Microcebus murinus</i>              | XM_012753729.2               | XM_012791226.1 | XM_012769991.2 | XP_012620637.1 | XP_012620638.1 |
|                              | Tarsier                     | <i>Carlito syrichta</i>                | XM_008071877.1               | NA             | XM_008063120.2 | XP_008065362.1 | XP_008065363.1 |
|                              | Bats                        | Pale spear-nosed bat                   | <i>Phyllostomus discolor</i> | XM_028532971.1 |                | XM_028507867.1 | XM_028512623.1 |
| Big brown bat                |                             | <i>Eptesicus fuscus</i>                | XM_008140435.2               |                | XM_028146098.1 | XM_008151290.2 | XM_008151289.2 |
| Black flying fox             |                             | <i>Pteropus alecto</i>                 | XM_006912643.3               |                | XM_006916002.2 | XM_006903991.3 | XM_006903992.3 |
| Vampire bat                  |                             | <i>Desmodus rotundus</i>               | XM_024575708.1               |                | XM_024560188.1 | XM_024554679.1 | XM_024554672.1 |
| Little brown bat             |                             | <i>Myotis lucifugus</i>                | XM_006084275.3               |                | XM_014468054.2 | XM_006087239.3 | XM_006087238.3 |
| Large flying fox             |                             | <i>Pteropus vampyrus</i>               | XM_011375981.2               |                | XM_023524003.1 | XM_011377936.2 | XM_011377934.2 |
| Great roundleaf bat          |                             | <i>Hipposideros armiger</i>            | XM_019643276.1               |                | XM_019663310.1 | XM_019643726.1 | XM_019643727.1 |
| Natal long-fingered bat      |                             | <i>Miniopterus natalensis</i>          | XM_016197509.1               |                | XM_016222895.1 | XM_016205154.1 | XM_016205152.1 |
| Egyptian fruit bat           |                             | <i>Rousettus aegyptiacus</i>           | XM_016140541.1               |                | XM_011381514.2 | XM_016139967.1 | XM_016139966.1 |
| David's myotis               |                             | <i>Myotis davidii</i>                  | XM_006773282.2               |                | XM_006758620.2 | XM_006762574.2 | XM_006762575.1 |
| Brandt's bat                 | <i>Myotis brandtii</i>      | XM_005866793.2                         |                              | XM_014531524.1 | XM_005866051.1 | XM_005866052.2 |                |
| Chinese rufous horseshoe bat | <i>Rhinolophus Sinicus</i>  | (Sequence recovered from BLAST)        |                              | NA             |                |                |                |
| Caniformia                   | California sea lion         | <i>Zalophus californianus</i>          | XM_027591714.1               |                | XM_027614789.1 |                |                |
|                              | Grizzly bear                | <i>Ursus arctos horribilis</i>         | XM_026502374.1               |                | XM_026506245.1 |                |                |
|                              | Red fox                     | <i>Vulpes vulpes</i>                   | XM_025995541.1               |                | XM_026013266.1 |                |                |
|                              | Northern fur seal           | <i>Callorhinus ursinus</i>             | XM_025879900.1               |                | XM_025852888.1 |                |                |
|                              | Dingo                       | <i>Canis lupus dingo</i>               | XM_025455488.1               |                | XM_025432462.1 |                |                |
|                              | Dog                         | <i>Canis lupus familiaris</i>          | XM_022411076.1               |                | NA             |                |                |
|                              | Hawaiian monk seal          | <i>Neomonachus schauinslandi</i>       | XM_021690455.1               |                | XM_021691775.1 |                |                |
|                              | Giant panda                 | <i>Ailuropoda melanoleuca</i>          | XM_011223360.2               |                | XM_002918884.3 |                |                |
|                              | Ferret                      | <i>Mustela putorius furo</i>           | XM_013057870.1               |                | XM_004747571.2 |                |                |
|                              | Pacific walrus              | <i>Odobenus rosmarus divergens</i>     | XM_004406992.2               |                | XM_004392264.2 |                |                |
| Polar bear                   | <i>Ursus maritimus</i>      | XM_008707020.1                         |                              | XM_008695194.1 |                |                |                |
| Bovids                       | Cow                         | <i>Bos taurus</i>                      | NM_174547.2                  |                | NM_174126.2    |                |                |
|                              | Zebu                        | <i>Bos indicus</i>                     | XM_019961517.1               |                | XM_019966181.1 |                |                |
|                              | Yak                         | <i>Bos mutus</i>                       | XM_005903614.2               |                | XM_005900781.2 |                |                |
|                              | Bison                       | <i>Bison bison bison</i>               | XM_010858720.1               |                | XM_010846069.1 |                |                |
|                              | Water buffalo               | <i>Bubalus bubalis</i>                 | XM_006055135.2               |                | XM_006064377.2 |                |                |
|                              | Goat                        | <i>Capra hircus</i>                    | XM_018048449.1               |                | NM_001285674.1 |                |                |
|                              | Sheep                       | <i>Ovis aries</i>                      | XM_027967845.1               |                | XM_004004267.4 |                |                |
|                              | Mouflon                     | <i>Ovis aries musimon</i>              | XM_012150903.1               |                | NA             |                |                |
| Myomorpha                    | House mouse                 | <i>Mus musculus</i>                    | NM_001127318.1               |                | NM_173788.4    |                |                |
|                              | Ryukyu mouse                | <i>Mus caroli</i>                      | XM_021165238.1               |                | XM_021159499.2 |                |                |
|                              | Gairdner's shrewmouse       | <i>Mus pahari</i>                      | XM_021190835.1               |                | XM_021222144.2 |                |                |
|                              | Norway Rat                  | <i>Rattus norvegicus</i>               | NM_013170.1                  |                | NM_053838.1    |                |                |
|                              | Mongolian gerbil            | <i>Meriones unguiculatus</i>           | XM_021644291.1               |                | XM_021658450.1 |                |                |
|                              | Prairie vole                | <i>Microtus ochrogaster</i>            | XM_005364517.2               |                | XM_026786619.1 |                |                |
|                              | Deer Mouse                  | <i>Peromyscus maniculatus bairdii</i>  | XM_006976515.1               |                | XM_006986011.1 |                |                |
|                              | Chinese hamster             | <i>Cricetulus griseus</i>              | XM_027429909.1               |                | XM_027403228.1 |                |                |
| Golden hamster               | <i>Mesocricetus auratus</i> | XM_005072889.3                         |                              | XM_013119692.2 |                |                |                |
| Lesser Egyptian jerboa       | <i>Jaculus jaculus</i>      | XM_004671850.1                         |                              | XM_004658329.2 |                |                |                |

**Table S2: Likelihood ratio tests for positive selection in mammalian GC-C and NPR genes. Related to Figure 1.**

| Group      | Gene                 | # species | BUSTED p-value | PAML M1-M2 p-value | PAML M7-M8 p-value | PAML M0 dN/dS | PAML M8 tree length | Sites BEB > 95% |
|------------|----------------------|-----------|----------------|--------------------|--------------------|---------------|---------------------|-----------------|
| Primates   | GC-C                 | 19        | 0.001          | 0.0004             | 1.53E-05           | 0.243         | 1.067               | 6               |
| Primates   | GC-C (extracellular) | 19        | 1.77E-04       | 0.0023             | 0.0012             | 0.435         | 1.595               | 6               |
| Primates   | GC-C (Intracellular) | 19        | 1.000          | 1.0000             | 0.6974             | 0.084         | 0.703               | 0               |
| Primates   | NPR1                 | 14        | 1.000          | 1.0000             | 0.0624             | 0.066         | 0.561               | 1               |
| Primates   | NPR2                 | 19        | 1.000          | 0.5576             | 0.9996             | 0.043         | 0.399               | 0               |
| Bats       | GC-C                 | 12        | <1.0E-18       | 1.69E-19           | 7.27E-21           | 0.429         | 1.774               | 35              |
| Bats       | GC-C (extracellular) | 12        | 2.22E-16       | 5.99E-24           | 7.65E-25           | 0.954         | 2.626               | 41              |
| Bats       | GC-C (Intracellular) | 12        | 0.1            | 1.0000             | 0.8561             | 0.128         | 1.158               | 0               |
| Bats       | NPR2                 | 11        | 0.994          | 1.0000             | 0.9999             | 0.042         | 0.582               | 0               |
| Myomorpha  | GC-C                 | 10        | 2.36E-06       | 1.0000             | 1.60E-05           | 0.133         | 1.877               | 5               |
| Myomorpha  | NPR2                 | 10        | 1.000          | 1.0000             | 0.9971             | 0.013         | 0.880               | 0               |
| Caniformia | GC-C                 | 11        | 0.065          | 0.9926             | 0.9052             | 0.189         | 0.543               | 0               |
| Bovids     | GC-C                 | 8         | 1.000          | 0.2218             | 0.2017             | 0.117         | 0.172               | 1               |

**Table S3: Positively selected amino acid positions in primate and bat GC-C identified by PAML. Related to Figure 1.**

|              | Sites with dN/dS > 1 * | Probability  |
|--------------|------------------------|--------------|
| Primate GC-C | S21                    | 0.909        |
|              | <b>F22</b>             | <b>0.966</b> |
|              | S23                    | 0.908        |
|              | Q25                    | 0.975        |
|              | V224                   | 0.983        |
|              | G251                   | 0.939        |
|              | <b>Q279</b>            | <b>0.965</b> |
|              | R312                   | 0.923        |
|              | T317                   | 0.93         |
|              | <b>D364</b>            | <b>0.99</b>  |
|              | W372                   | 0.927        |
|              | <b>Y406</b>            | <b>0.985</b> |
|              | S419                   | 0.928        |
|              | R688                   | 0.915        |
| Bat GC-C     | <b>I 21</b>            | <b>0.99</b>  |
|              | <b>W 22</b>            | <b>0.981</b> |
|              | T 23                   | 0.997        |
|              | S 24                   | 0.996        |
|              | P 25                   | 0.977        |
|              | S 27                   | 0.997        |
|              | H 31                   | 0.975        |
|              | I 34                   | 0.971        |
|              | Q 48                   | 0.995        |
|              | E 52                   | 0.997        |
|              | E 60                   | 0.966        |
|              | R 66                   | 0.964        |
|              | E 67                   | 0.996        |
|              | I 70                   | 0.989        |
|              | N 71                   | 0.917        |
|              | S 72                   | 0.901        |
|              | S 79                   | 0.901        |
|              | S 81                   | 0.955        |
|              | Y 84                   | 0.909        |
|              | <b>P 88</b>            | <b>0.998</b> |
|              | V 93                   | 0.929        |
|              | T 111                  | 0.98         |
|              | <b>K 114</b>           | <b>0.986</b> |
|              | A 177                  | 0.99         |
|              | S 186                  | 0.913        |
|              | N219                   | 0.941        |
|              | <b>N 221</b>           | <b>0.992</b> |
|              | K 230                  | 0.944        |
|              | H 239                  | 0.913        |
|              | N 240                  | 0.944        |
|              | <b>T 251</b>           | <b>0.989</b> |
|              | T 254                  | 0.937        |
|              | <b>S 256</b>           | <b>0.998</b> |
|              | I 257                  | 0.914        |
|              | Q 282                  | 0.929        |
|              | S 300                  | 0.927        |
|              | <b>T 304</b>           | <b>0.972</b> |
|              | <b>I 308</b>           | <b>0.977</b> |
|              | S 309                  | 0.915        |
|              | <b>M 318</b>           | <b>0.951</b> |
|              | D 345                  | 0.933        |
| <b>L 349</b> | <b>0.989</b>           |              |
| <b>E 402</b> | <b>0.992</b>           |              |
| <b>V 404</b> | <b>0.996</b>           |              |
| <b>E 406</b> | <b>0.985</b>           |              |
| <b>A 407</b> | <b>0.952</b>           |              |
| <b>T 410</b> | <b>0.99</b>            |              |
| N 419        | 0.942                  |              |
| N 423        | 0.932                  |              |
| A 425        | 0.937                  |              |
| <b>E 427</b> | <b>0.993</b>           |              |
| <b>R 428</b> | <b>0.958</b>           |              |
| N 744        | 0.944                  |              |
| R 993        | 0.94                   |              |

\*Posterior probabilities >90% by PAML Model 8 Bayes Empirical Bayes (BEB) analysis, probabilities >95% are bolded amino acid identities are shown for *H. sapiens* and *M. lucifugus* in primates and bats, respectively

**Table S4: GC-C dose-response values and statistics. Related to Figure 2.**

| Agonist                                                | Human          |               | Orangutan      |                | <i>M. lucifugus</i> |               | <i>P. vampyrus</i> * |               |
|--------------------------------------------------------|----------------|---------------|----------------|----------------|---------------------|---------------|----------------------|---------------|
|                                                        | Log EC50       | Maximum       | Log EC50       | Maximum        | Log EC50            | Maximum       | Log EC50             | Maximum       |
| STp                                                    | -6.345 ± 0.113 | 142.7 ± 8.437 | -6.382 ± 0.196 | 372.1 ± 38.36  | -7.028 ± 0.200      | 598.1 ± 48.08 | -6.925 ± 0.183       | 646.4 ± 54.4  |
| STh                                                    | -7.143 ± 0.127 | 117.5 ± 6.387 | -5.82 ± 0.098  | 250.1 ± 15.650 | -5.711 ± 0.116      | 560.5 ± 43.75 | -5.528 ± 0.118       | 325.7 ± 26.77 |
| Y-ST                                                   | -4.537 ± 0.635 | 279.9 ± 170.6 | -5.126 ± 0.066 | 195.7 ± 12.67  | -5.311 ± 7.455      | 434.2 ± 20.07 | N/A                  | N/A           |
| V-ST                                                   | -5.676 ± 0.139 | 131.2 ± 11.37 | -5.736 ± 0.101 | 103.2 ± 5.663  | -5.079 ± 0.1037     | 304.4 ± 33.31 | -5.251 ± 0.061       | 351.0 ± 22.45 |
| <b>P value (Dunnett's T3 multiple comparison test)</b> |                |               |                |                |                     |               |                      |               |
| STp vs. STh                                            | 0.0001         | 0.1184        | 0.078          | 0.0306         | <0.0001             | 0.9926        | <0.0001              | <0.0001       |
| STp vs. Y-ST                                           | 0.0519         | 0.9587        | <0.0001        | 0.0005         | >0.9999             | 0.0168        | N/A                  | N/A           |
| STp vs. V-ST                                           | 0.0029         | 0.9584        | 0.0306         | <0.0001        | <0.0001             | <0.0001       | <0.0001              | <0.0001       |
| STh vs. Y-ST                                           | 0.0023         | 0.9128        | <0.0001        | 0.0517         | >0.9999             | 0.0656        | N/A                  | N/A           |
| STh vs. V-ST                                           | <0.0001        | 0.8718        | 0.9914         | <0.0001        | 0.0007              | <0.0001       | 0.1176               | 0.8501        |
| Y-ST vs. V-ST                                          | 0.4165         | 0.9408        | <0.0001        | <0.0001        | >0.9999             | 0.0087        | N/A                  | N/A           |

\* *P. vampyrus* Y-ST dose/response parameters outside of tested range

A

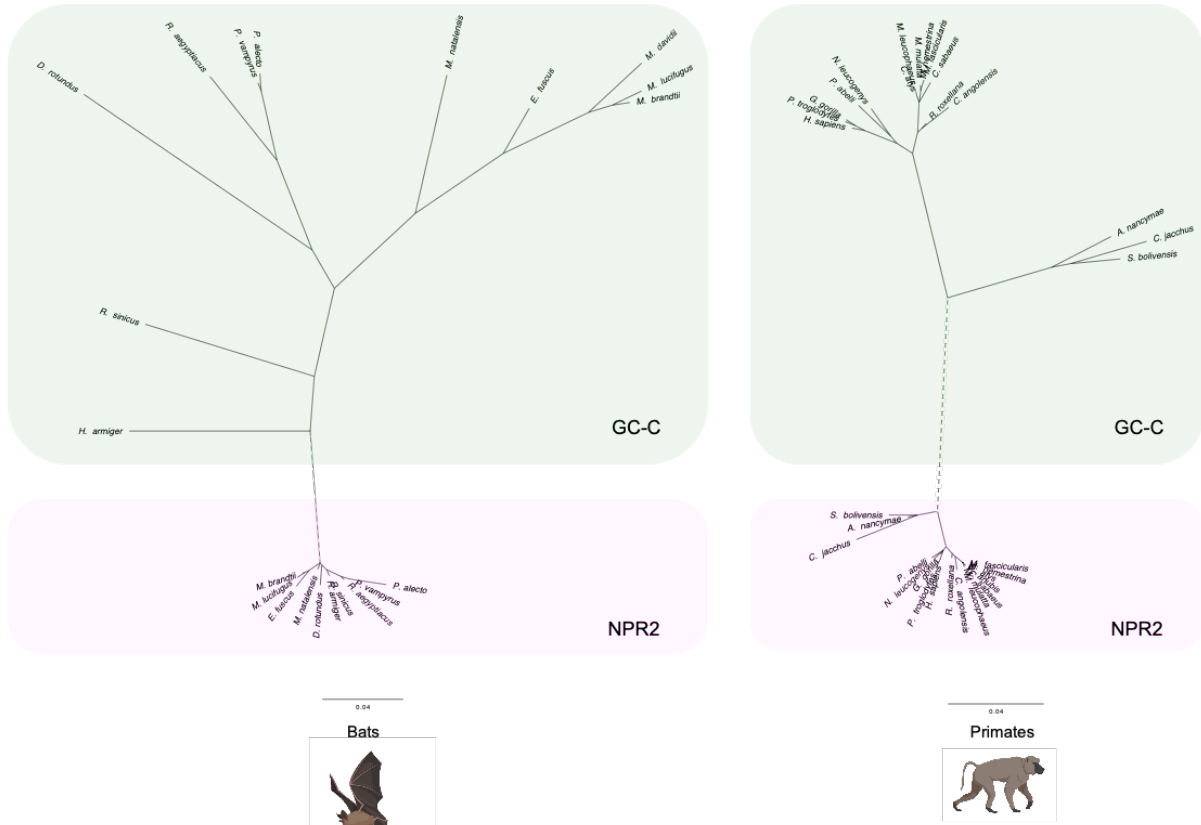

B

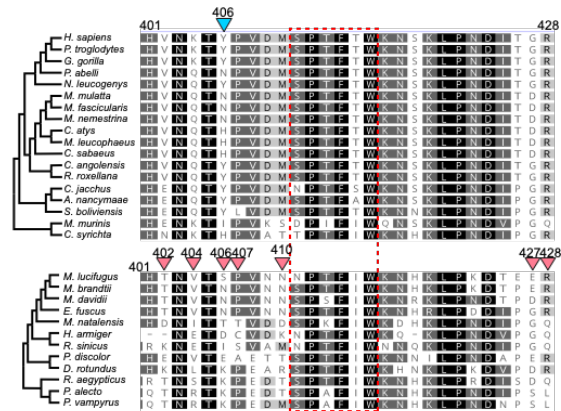

**Figure S1: Evolutionary analysis of GC-C.** Related to Figure 1. (A) Amino acid alignments were generated for the ligand-binding domains of GC-C and NPR2 in primates and bats. Trees were generated using PHYML with the Le Gascuel amino acid substitution model. Branches connecting NPR2 and GC-C trees are artificially collapsed (dashed line). (B) GC-C amino acid alignments are shown from primates (top) and bats (bottom) from amino acid 400-428. A proposed ligand-binding pocket is highlighted (red dashed box). Amino acid positions with significantly elevated dN/dS ratios are highlighted with blue (primates) or red (bats) triangles (PAML >95% posterior probability).

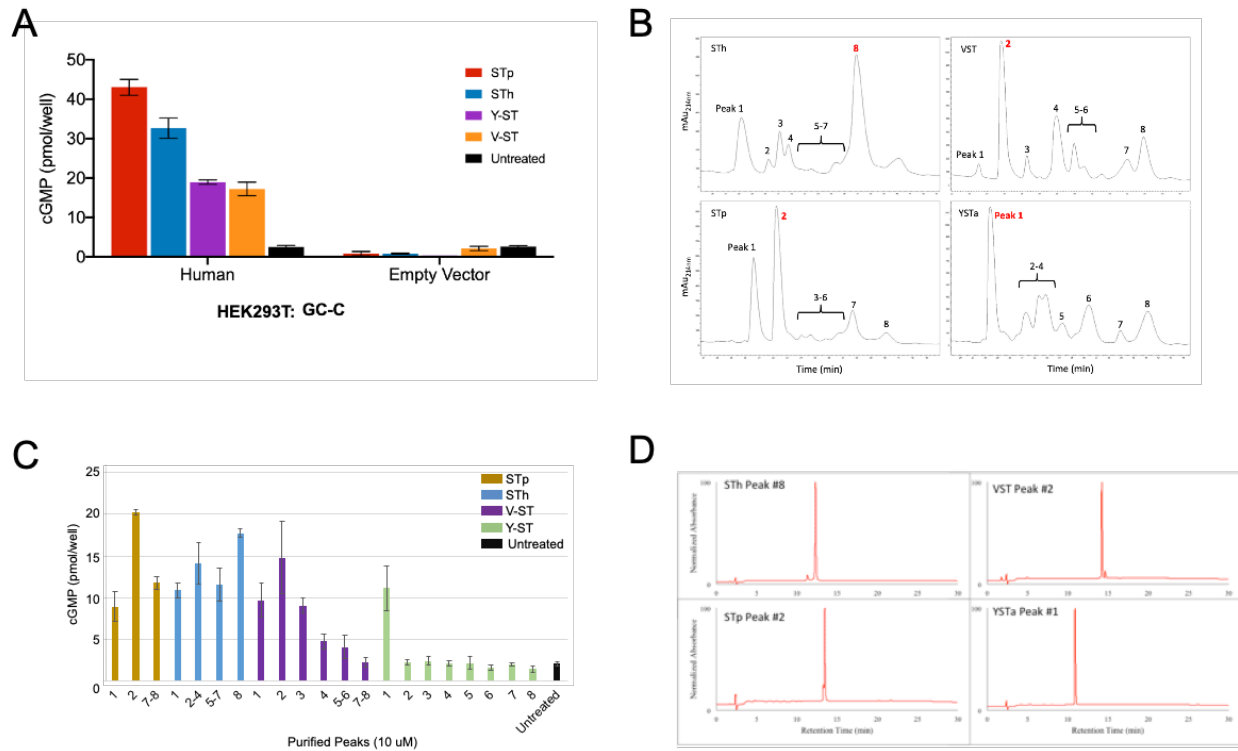

**Figure S2: Synthesis and functional verification of STa variants. Related to Figure 2.** (A) HEK293T cells transduced with lentivirus carrying Human GC-C or and empty vector were treated with the indicated peptides at a concentration of 5 $\mu$ M followed by measurement of intracellular cGMP by ELISA. (B) HPLC traces of each synthesized peptide shows evidence of ~8 peaks following air oxidation. Each peak was then collected for downstream analysis. (C) HEK293T cells expressing human GC-C were stimulated with the major purification products to identify the most potent fractions by measuring intracellular cGMP. For each peptide, the predominant oxidation product represented the most potent GC-C ligand. Some peaks were unable to be purified in isolation. (D) Final HPLC purification of toxin peptides used for analysis.

A

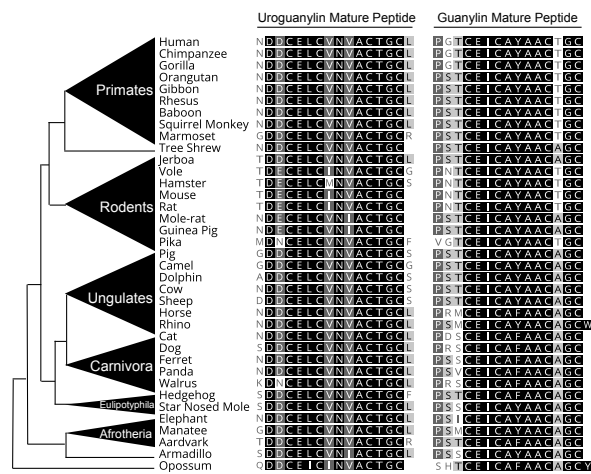

B

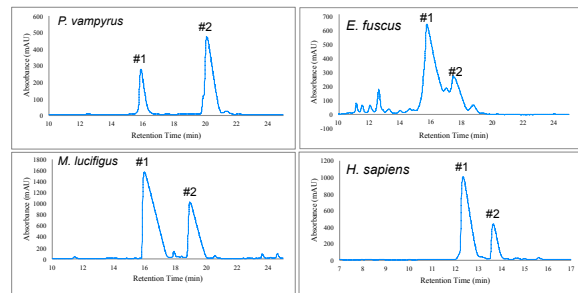

C

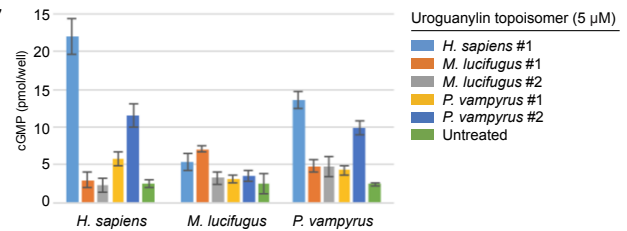

**Figure S3: Evolutionary and functional comparison of uroguanylin. Related to Figure 4.** (A) Guanylin and Uroguanylin secreted peptide sequences were downloaded from genbank for the indicated species and aligned using clustalW (B) HPLC traces of synthesized uroguanylin from the indicated species. Two distinct topoisomers were observed following oxidation of synthesized uroguanylin from each species. (C) cGMP generation assays in HEK293T cells expressing GC-C from the indicated species were performed to identify the most active topoisomer. Human isomer #1 is the known active peak. *E. fuscus* peak #1, *M. lucifugus* peak #1, and *P. vampyrus* peak #2 were used in experimental assays.
